# Supplementary material
Source: PubMed Central journal article supplement (PMC5981172)

**Revised Supplemental Table 3:** Primer sequences used in RT-PCR analysis of gene expression

| gene    | forward (5'-3')            | reverse (5'-3')          | chromosome / nucleotide position <sup>(a)</sup> |                             | comments                                    |
|---------|----------------------------|--------------------------|-------------------------------------------------|-----------------------------|---------------------------------------------|
| irf8-a  | AAAGGATGTGGAGCCCTCTGACTG   | GGAAACGCAGGAAAGGAATGC    | chr8                                            | 120755243-266 120755377-397 | 3'-UTR                                      |
| irf8-b  | TTCCTGAGATGGAGTGTGGC       | TGGGCTCCTCTTGGTCATAC     | chr8                                            | 120745659-678 120747225-244 | exon 4-5                                    |
| pel1-a  | AATCTGTTGTTGGTGACTTTTGTATG | GGAGTCCCAGGCAGTTATGAGC   | chr11                                           | 21142700-725 21142889-910   | "retained intron" transcript <sup>(b)</sup> |
| pel1-b  | GCCCCAGTAAAATATGGCGAA      | TTCCTCTATCACCGTTTGGGA    | chr11                                           | 21136151-171 21140578-598   | exon 2-3                                    |
| malt1-a | AGCATATCCAGGAGGACCGC       | CAGCTTGGGCAATGTTAAGATACC | chr18                                           | 65454165-184 65454328-351   | "retained intron" transcript <sup>(c)</sup> |
| malt1-b | CTGATCCAGTCCAGGGAGC        | AATGTGAACGCCACACTGAA     | chr18                                           | 65470467-485 65473027-046   | exon 15-16                                  |
| ccl22-a | CCTCAGAAAATAGATGGTTGTGGG   | CTGTTGTCTCCAGGGAAGCAAG   | chr8                                            | 94750926-949 94751039-060   | 3'-UTR                                      |
| ccl22-b | GGACTACATCCGTCACCCTC       | AGTAGCTTCTTCACCCAGACC    | chr8                                            | 94746942-961 94749850-870   | exon 2-3                                    |
| LIF     | AACCAGATCAAGAATCAACTGGC    | TGTTAGGCGCACATAGCTTTT    | chr11                                           | 4268303-325 4268961-981     | exon 4-5                                    |
| ligp1   | GAGCCTGTAGCAGTGAAGGT       | GCTGACCCATGACTTCAAGC     | chr18                                           | 60376057-076 60389802-821   | exon 2-5                                    |
| Gbp2    | TGACTGAGAAGATGAAAGACGAAC   | TTTTGCTCTATTCTCGAATCCTT  | chr3                                            | 142635903-926 142637405-428 | exon 10-11                                  |
| Gbp3    | GTGGTGGTGGCCATTGTTG        | GGCACACACCACATCCAGA      | chr3                                            | 142561860-878 142564148-166 | exon 3-4                                    |
| Gbp6    | GAAGGAAGCTGGAGCAGGA        | TCTCAGTTGCTGTATCTCTTTGTT | chr5                                            | 105274239-257 105273213-236 | exon 12-13                                  |

(a) reference sequence GRCm38.p4 C57BL/6J

(b) Peli1 transcripts with "retained intron": ENSMUST00000156122.7; ENSMUST00000149675.1

(c) Malt1 transcripts with "retained intron": ENSMUST00000225085.1; ENSMUST00000224229.1

Supplemental Figure S2:     **EPCR-dependent biomarker regulation in cultured RAW cells.**

RAW cells were treated for 3h with the indicated TLR ligands, and the abundance of *Irf8*, *Ccl22*, and *Malt1* mRNA relative to 18S rRNA was measured by RT-PCR. Data represent the average  $\pm$  standard deviation from 2 independent experiments with triplicate measurements of each sample. Ctrl: untreated sample. Asterisk indicates  $P < 0.01$  by pairwise comparison to levels in the untreated sample (Student's 2-tailed T-test). HKLM: heat-killed *L.monocytogenes*; FLA-ST: Flagellin *S.typhimurium* (TLR5 agonist; RAW cells lack TLR5); FSL-1: Pam2CGDPKHPKSF.

Figure S2

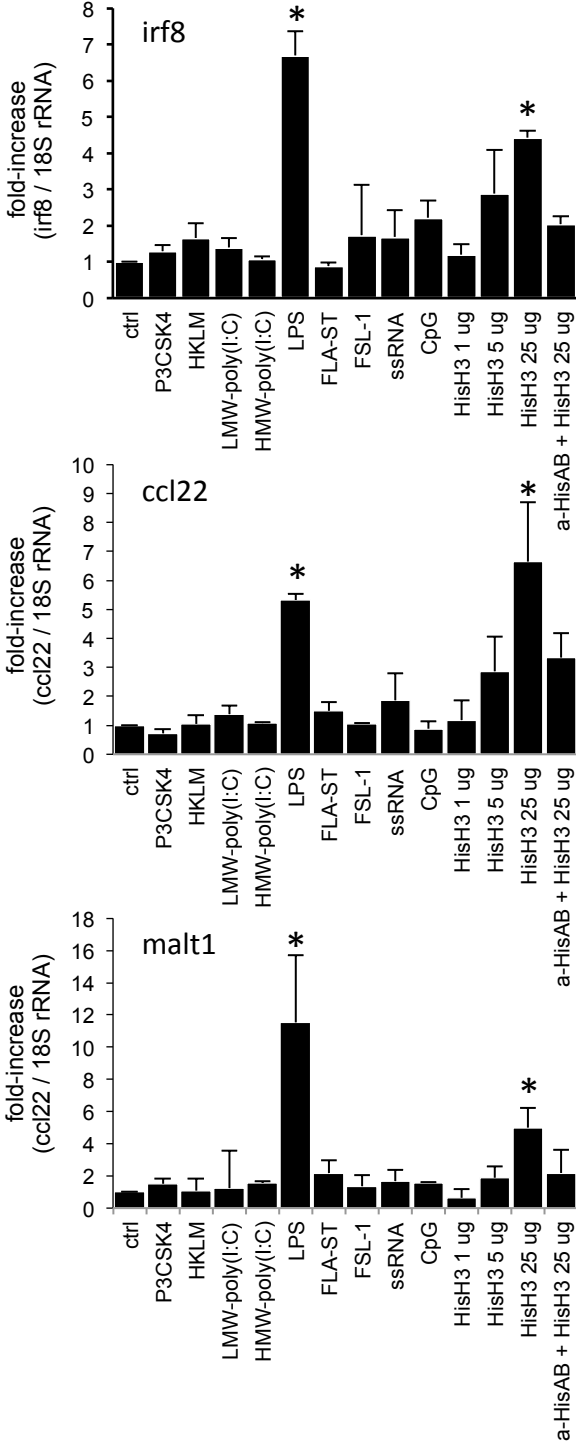

Supplemental Figure S3: Biomarker induction by LPS in PAR-deficient BMDC

*Irf8*, *Ccl22*, and *Malt1* mRNA abundance relative to 18S rRNA was measured via RT-PCR in LPS-treated BMDC prepared from wildtype mice and mice lacking the indicated PARs. Data are expressed as the -fold increase over baseline levels in wildtype cells and represent the average  $\pm$  standard deviation of 4 culture experiments with triplicate measurements per sample. Asterisk indicates  $P < 0.01$  for LPS-treated samples in comparison to wildtype cells via Student's t-test.

Figure S3

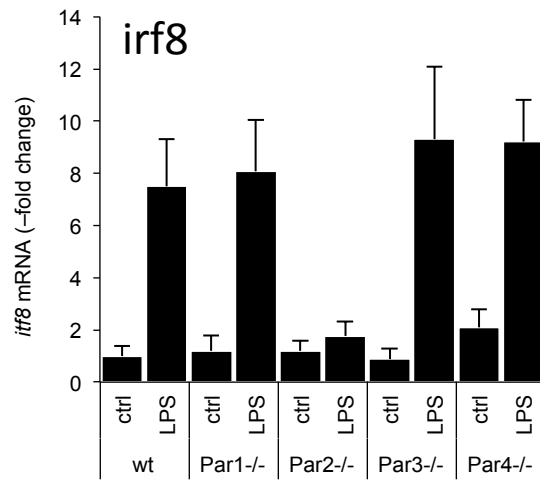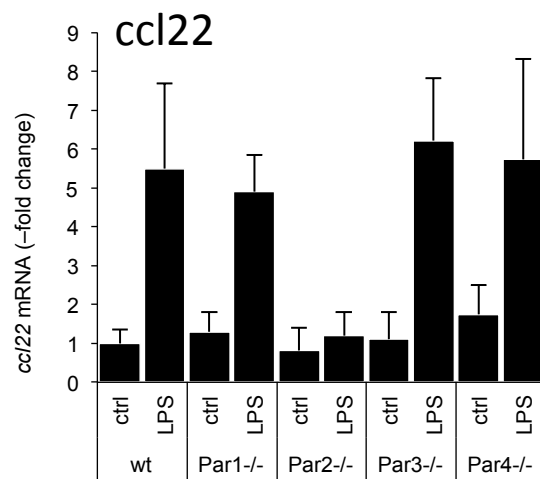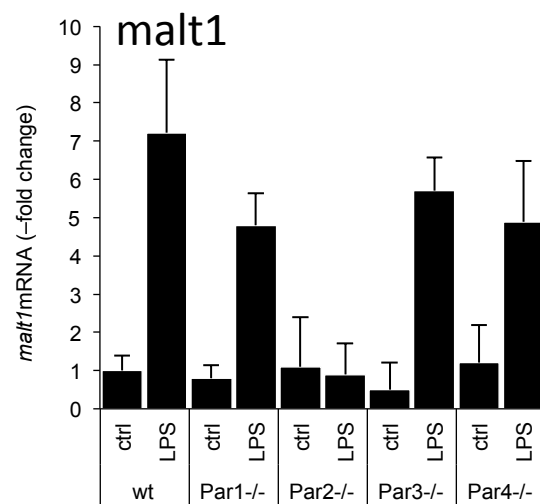

Supplement: blood845123-suppl1.pdf [file blood845123-suppl1.pdf]
